# Supplementary material for: Should All Fractions of the Boar Ejaculate Be Prepared for Insemination Rather Than Using the Sperm Rich Only?
Source: MDPI journal article supplement (doi:10.3390/biology11020210), 2022-01-28
Supplement: s1 [file s1]

**Table S1.** Number and type of ejaculates used per male in the study.

|               | <b>F1</b> | <b>F2</b> | <b>F3</b> | <b>Total</b> |
|---------------|-----------|-----------|-----------|--------------|
| <b>Boar 1</b> | 3         | 3         | 2         | 8            |
| <b>Boar 2</b> | 3         | 3         | 3         | 9            |
| <b>Boar 3</b> | 2         | 2         | 4         | 9            |
| <b>Boar 4</b> | 4         | 3         | 2         | 9            |
| <b>Boar 5</b> | 2         | 3         | 3         | 8            |
| <b>Boar 6</b> | 3         | 3         | 3         | 9            |
| <b>Total</b>  | 17        | 17        | 17        | 51           |

**Table S2.** Red blood cells and reticulocytes parameters analyzed in three groups of piglets derived from AI (F1, F2, F3). Data are represented as mean  $\pm$  SD (standard deviation).

|                                                      | <b>F1</b>        | <b>F2</b>        | <b>F3</b>        | <b>p-value</b> |
|------------------------------------------------------|------------------|------------------|------------------|----------------|
|                                                      | <b>(n= 25)</b>   | <b>(n= 27)</b>   | <b>(n= 29)</b>   |                |
| <b>HTC (%)</b>                                       | 34.85 $\pm$ 4.87 | 33.99 $\pm$ 4.13 | 35.40 $\pm$ 3.25 | 0.437          |
| <b>RBC (x10<sup>6</sup> cells/<math>\mu</math>L)</b> | 5.96 $\pm$ 0.62  | 5.77 $\pm$ 0.55  | 5.96 $\pm$ 0.45  | 0.360          |
| <b>HB (g/dl)</b>                                     | 10.94 $\pm$ 1.61 | 10.71 $\pm$ 1.43 | 11.35 $\pm$ 1.15 | 0.230          |
| <b>MCV (fL)</b>                                      | 58.32 $\pm$ 5.01 | 58.82 $\pm$ 5.02 | 59.43 $\pm$ 3.47 | 0.666          |
| <b>MCH (pg)</b>                                      | 18.30 $\pm$ 2.01 | 18.51 $\pm$ 1.91 | 19.03 $\pm$ 1.22 | 0.281          |
| <b>MCHC (pg)</b>                                     | 31.34 $\pm$ 1.27 | 31.41 $\pm$ 1.27 | 32.04 $\pm$ 1.10 | 0.71           |
| <b>CHCM (g/dl)</b>                                   | 28.94 $\pm$ 1.35 | 28.87 $\pm$ 1.10 | 29.28 $\pm$ 1.23 | 0.418          |
| <b>RDW (%)</b>                                       | 18.48 $\pm$ 3.78 | 18.57 $\pm$ 3.95 | 17.07 $\pm$ 1.96 | 0.171          |
| <b>CH (pg)</b>                                       | 16.94 $\pm$ 1.92 | 17.02 $\pm$ 1.64 | 17.42 $\pm$ 1.16 | 0.493          |
| <b>CHDW (g/dl)</b>                                   | 3.18 $\pm$ 0.39  | 3.27 $\pm$ 0.47  | 3.08 $\pm$ 0.29  | 0.208          |
| <b>HDW (g/dl)</b>                                    | 2.38 $\pm$ 0.25  | 2.43 $\pm$ 0.35  | 2.44 $\pm$ 0.20  | 0.659          |
| <b>RET (%)</b>                                       | 4.33 $\pm$ 2.60  | 4.36 $\pm$ 1.71  | 4.27 $\pm$ 1.61  | 0.985          |
| <b>RET (x10<sup>6</sup> cells/<math>\mu</math>L)</b> | 0.25 $\pm$ 0.12  | 0.24 $\pm$ 0.08  | 0.25 $\pm$ 0.09  | 0.986          |
| <b>McvR (fL)</b>                                     | 52.43 $\pm$ 6.84 | 51.87 $\pm$ 6.73 | 53.28 $\pm$ 4.94 | 0.691          |
| <b>CHr (pg)</b>                                      | 15.10 $\pm$ 1.85 | 15.17 $\pm$ 1.92 | 15.53 $\pm$ 1.39 | 0.616          |

**Table S3.** White blood cells parameters analyzed in the three groups of piglets derived from AI (F1, F2, F3). Data are represented as mean  $\pm$  SD (standard deviation).

|                | <b>F1</b>       | <b>F2</b>       | <b>F3</b>       | <b>p-value</b> |
|----------------|-----------------|-----------------|-----------------|----------------|
|                | <b>(n= 25)</b>  | <b>(n= 27)</b>  | <b>(n= 29)</b>  |                |
| <b>WBC (%)</b> | 9.81 $\pm$ 3.13 | 8.46 $\pm$ 2.81 | 9.26 $\pm$ 3.40 | 0.299          |

|                                       |             |             |            |       |
|---------------------------------------|-------------|-------------|------------|-------|
| <b>NEU (%)</b>                        | 34.20±12.05 | 31.91±12.40 | 29.32±8.29 | 0.269 |
| <b>NEU (x10<sup>3</sup> cells/μL)</b> | 3.58±2.21   | 2.89±1.75   | 2.81±1.51  | 0.255 |
| <b>LYM (%)</b>                        | 55.19±12.66 | 57.49±13.55 | 60.94±8.87 | 0.201 |
| <b>LYM (x10<sup>3</sup> cells/μL)</b> | 5.18±1.42   | 4.66±1.47   | 5.52±1.85  | 0.145 |
| <b>MON (%)</b>                        | 5.78±2.68   | 6.29±3.08   | 5.11±2.42  | 0.273 |
| <b>MON (x10<sup>3</sup> cells/μL)</b> | 0.58±0.34   | 0.54±0.34   | 0.49±0.31  | 0.635 |
| <b>EOS (%)</b>                        | 1.47±1.04   | 1.26±0.69   | 1.17±0.62  | 0.390 |
| <b>EOS (x10<sup>3</sup> cells/μL)</b> | 0.14±0.10   | 0.11±0.08   | 0.11±0.07  | 0.315 |
| <b>BAS (%)</b>                        | 1.20±0.68   | 1.18±0.63   | 1.21±0.55  | 0.982 |
| <b>BAS (x10<sup>3</sup> cells/μL)</b> | 0.11±0.06   | 0.09±0.045  | 0.11±0.09  | 0.443 |

**Table S4.** Platelet parameters analyzed in the three groups of piglets derived from AI (F1, F2, F3). Data are represented as mean ± SD (standard deviation).

|                                             | <b>F1</b><br><b>(n= 25)</b> | <b>F2</b><br><b>(n= 27)</b> | <b>F3</b><br><b>(n= 29)</b> | <b>p-value</b> |
|---------------------------------------------|-----------------------------|-----------------------------|-----------------------------|----------------|
| <b>PLT (x10<sup>3</sup> cells/μL)</b>       | 249.64±159.19               | 226.25±146.10               | 200.06±111.72               | 0.429          |
| <b>PCT (%)</b>                              | 0.34±0.32                   | 0.26±0.17                   | 0.24±0.12                   | 0.236          |
| <b>MPV (fL)</b>                             | 12.97±4.10                  | 12.25±3.03                  | 12.65±3.51                  | 0.768          |
| <b>PDW (%)</b>                              | 84.00±8.59                  | 80.76±19.52                 | 86.70±14.44                 | 0.338          |
| <b>MPC (g/dl)</b>                           | 21.70±2.31                  | 20.72±2.31                  | 20.66±2.32                  | 0.198          |
| <b>PCDW (g/dl)</b>                          | 7.19±0.73                   | 7.23±0.95                   | 7.22±0.80                   | 0.983          |
| <b>MPM (pg)</b>                             | 1.53±0.19                   | 1.49±0.19                   | 1.43±0.17                   | 0.185          |
| <b>PMDW (pg)</b>                            | 0.88±0.13                   | 0.87±0.13                   | 0.84±0.13                   | 0.487          |
| <b>Large PLT (x10<sup>3</sup> cells/μL)</b> | 51.68±77.39                 | 30.62±32.59                 | 29.20±19.56                 | 0.178          |

**Table S5.** Biochemical serum parameters analyzed in the three groups of piglets derived from AI (F1, F2, F3). Data are represented as mean ± SD (standard deviation). Different letters (a, b) in the same row indicate a significant difference between experimental groups (p< 0.05).

|                    | <b>F1</b><br><b>(n= 25)</b> | <b>F2</b><br><b>(n= 27)</b> | <b>F3</b><br><b>(n= 29)</b> | <b>p-value</b> |
|--------------------|-----------------------------|-----------------------------|-----------------------------|----------------|
| <b>PROT (g/dl)</b> | 1.92±0.73                   | 1.55±0.47                   | 2.20±0.66                   | 0.284          |
| <b>ALB (g/dl)</b>  | 3.00±0.33                   | 2.96±0.30                   | 2.92±0.36                   | 0.691          |
| <b>GLO (g/dl)</b>  | 2.21±0.62                   | 2.39±0.36                   | 2.16±0.60                   | 0.262          |
| <b>CR (mg/dl)</b>  | 1.06±0.20                   | 1.00±0.32                   | 1.02±0.16                   | 0.637          |
| <b>URE (mg/dl)</b> | 19.61±9.8                   | 17.02±6.64                  | 15.76±9.30                  | 0.266          |
| <b>GLU (mg/dl)</b> | 107.46±15.11                | 103.94±22.39                | 104.78±16.74                | 0.774          |

|                     |                  |                  |                  |       |
|---------------------|------------------|------------------|------------------|-------|
| <b>CHOL</b> (mg/dl) | 151.99±42.54     | 164.67±57.11     | 156.23±41.87     | 0.620 |
| <b>TRI</b> (mg/dl)  | 69.40±24.27      | 77.96±32.04      | 71.62±20.71      | 0.467 |
| <b>LIP</b> (UI/L)   | 23.56±13.02      | 27.10±13.74      | 20.20±12.74      | 0.153 |
| <b>CK</b> (UI/L)    | 5298.55±14535.36 | 4628.94±10123.61 | 8169.97±17331.45 | 0.621 |
| <b>ALP</b> (UI/L)   | 1020.19±490.33   | 1062.45±231.40   | 1083.40±453.97   | 0.848 |
| <b>GGT</b> (UI/L)   | 208.38±122.30    | 241.54±143.57    | 206.82±84.65     | 0.480 |
| <b>AST</b> (UI/L)   | 194.16±310.59    | 154.87±110.76    | 206.04±269.91    | 0.721 |
| <b>ALT</b> (UI/L)   | 49.40±40.98      | 57.05±42.31      | 60.88±51.39      | 0.647 |
| <b>TBIL</b> (mg/dl) | 0.22±0.22        | 0.20±0.25        | 0.13±0.15        | 0.246 |
| <b>Ca</b> (mg/dl)   | 11.41±0.76       | 11.11±0.51       | 11.35±0.47       | 0.159 |
| <b>K</b> (mmol/L)   | 9.20±2.17        | 9.54±1.31        | 8.79±1.70        | 0.291 |
| <b>Na</b> (mmol/L)  | 130.70±11.12     | 133.66±11.04     | 129.42±14.68     | 0.437 |
| <b>Cl</b> (mmol/L)  | 98.19±9.25       | 100.73±8.57      | 96.98±12.43      | 0.391 |

---
